# Supplementary material
Source: PubMed Central journal article supplement (PMC4073427)
Supplement: ASN.2013060596_ASN2013060596SupplementaryData.pdf [file ASN.2013060596_ASN2013060596SupplementaryData.pdf]

**Supplemental Figure 1**

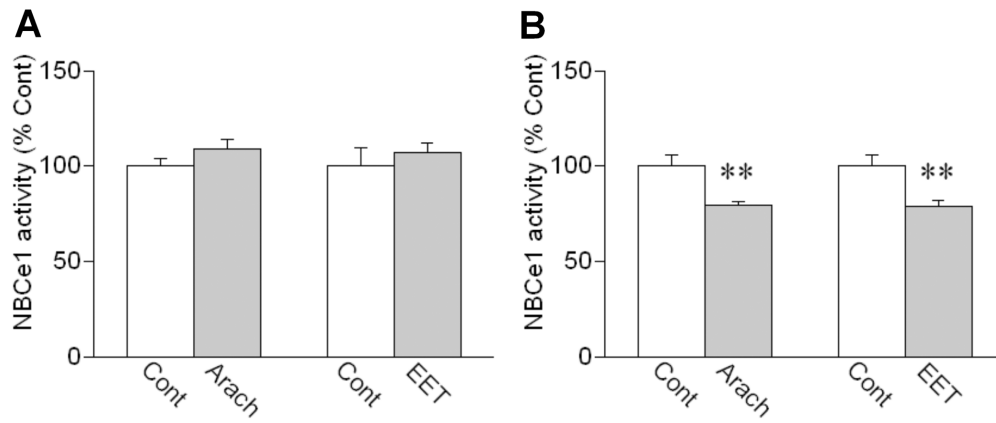

**Supplemental Figure 1. Effects of arachidonic acid (Arach,  $10^{-7}$  M) and 5,6-EET (EET,  $10^{-7}$  M) on NBCe1 in human and mouse PTs. (A) Results in human PTs. N = 7 for each experiment. (B) Results in mouse PTs. N = 7 for each experiment \*\*P < 0.01 vs. Cont.**

**Supplemental Figure 2**

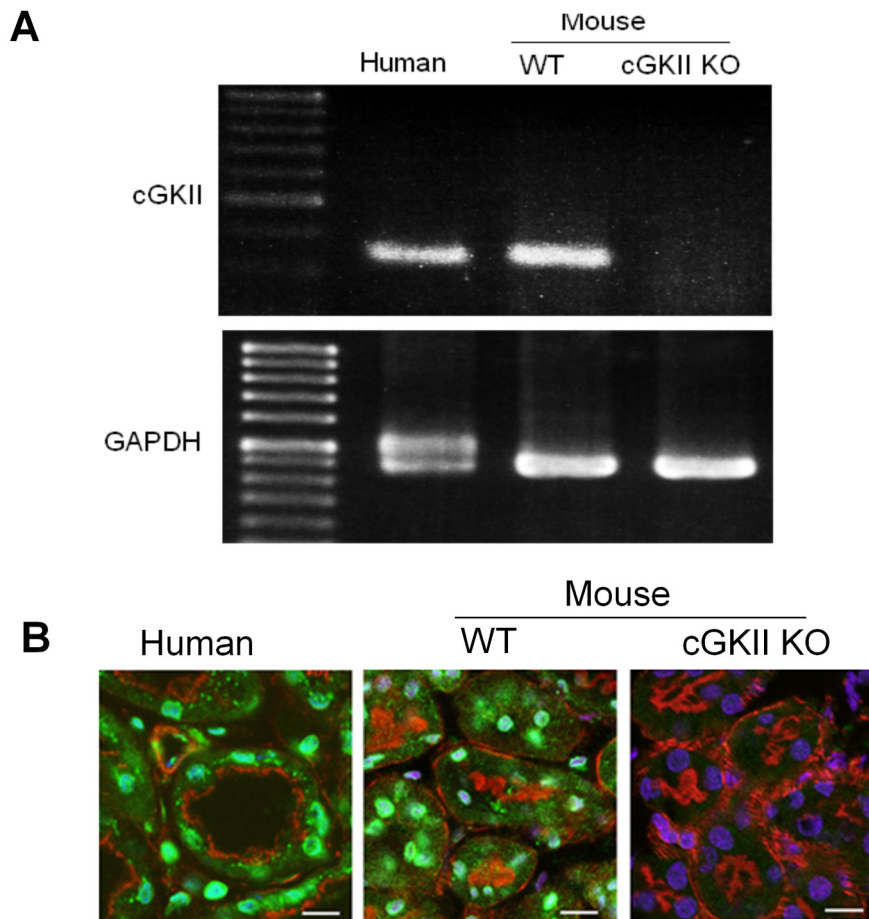

**Supplemental Figure 2. Expression of cGKII in kidney cortex of human, and WT and cGKII KO mice.** (A) RT-PCR analysis of cGKII and GAPDH. (B) Intracellular localization of cGKII in PTs analyzed by confocal microscopy. Images are shown in pseudocolor, where green shows cGKII, red actin, and blue nuclei. Bars indicate 10  $\mu$ m.

### Supplemental Figure 3

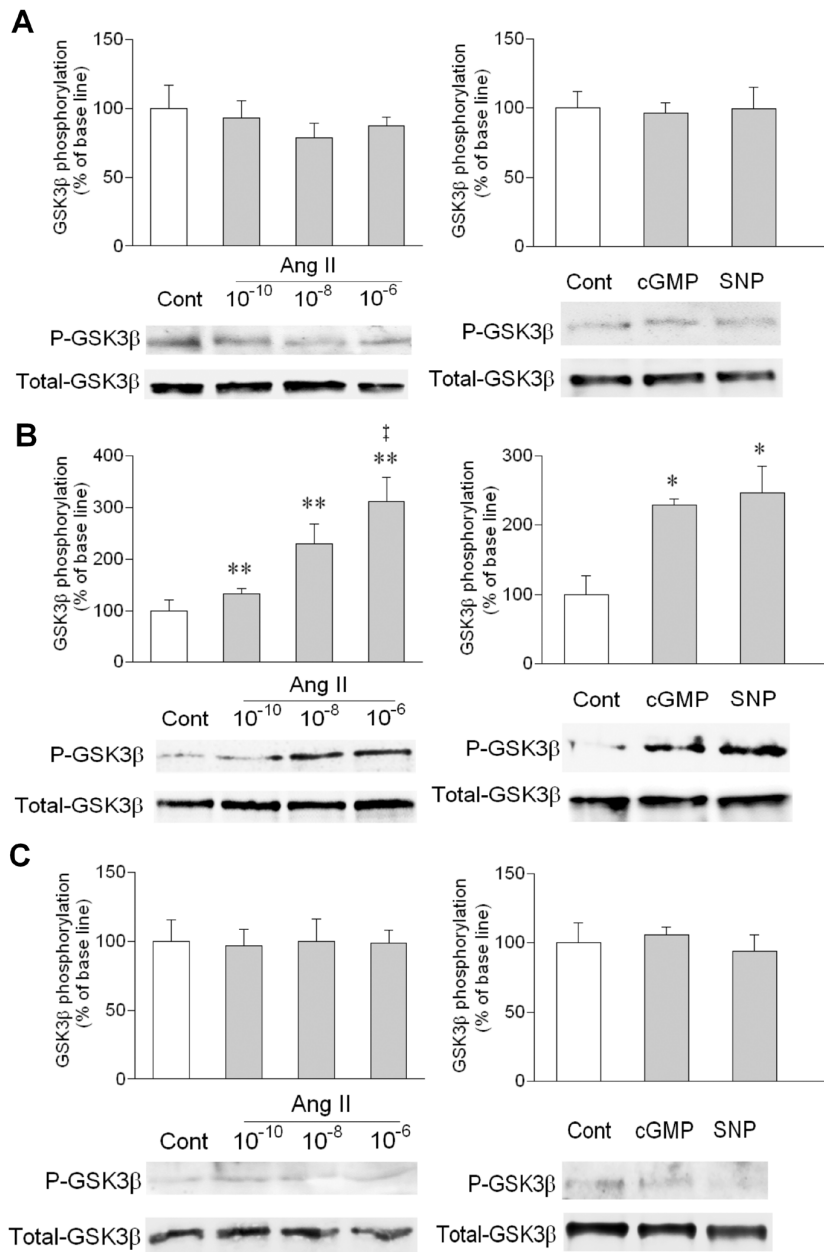

**Supplemental Figure 3. Effects of Ang II/NO/cGMP pathway on GSK3 $\beta$  phosphorylation in kidney cortex of human, and WT and cGKII KO mice.** (A) Results in human kidney cortex. In densitometric analyses (upper parts), the relative density of P-GSK3 $\beta$  to T-GSK3 $\beta$  is shown. N = 4 for each concentration of Ang II, and for both cGMP ( $2 \times 10^{-5}$  M) and SNP ( $10^{-3}$  M). (B) Results in WT mouse kidney cortex. N = 5 for each concentration of Ang II, and n = 4 for both cGMP ( $2 \times 10^{-5}$  M) and SNP ( $10^{-3}$  M). \*P < 0.05 vs. Cont. \*\*P < 0.01 vs. Cont. ‡P < 0.01 vs. Ang II  $10^{-10}$  M. (C) Results in cGKII KO mouse kidney cortex. N = 4 for each concentration of Ang II, and for both cGMP ( $2 \times 10^{-5}$  M) and SNP ( $10^{-3}$  M).
